# Supplementary material for: A Fatty Diet Induces a Jejunal Ketogenesis Which Inhibits Local SGLT1-Based Glucose Transport via an Acetylation Mechanism—Results from a Randomized Cross-Over Study between Iso-Caloric High-Fat versus High-Carbohydrate Diets in Healthy Volunteers
Source: MDPI journal article supplement (doi:10.3390/nu14091961), 2022-05-07
Supplement: s1 [file s1]

Protocol Registration Receipt

03/14/2014

Diet Induced Intestinal Mucosal Adaptation

This study is currently recruiting participants.

Verified by Prof Lars Fandriks, Göteborg University, March 2014

|                                                 |                                         |
|-------------------------------------------------|-----------------------------------------|
| Sponsor:                                        | Göteborg University                     |
| Collaborators:                                  | Sahlgrenska University Hospital, Sweden |
| Information provided by<br>(Responsible Party): | Prof Lars Fandriks, Göteborg University |
| ClinicalTrials.gov Identifier:                  | NCT02088853                             |

► Purpose

Human beings are 'omnivores' meaning that all principal components of food (i.e. the macronutrients: carbohydrates, fat, proteins) can be assimilated by the gastrointestinal tract. When the gut mucosa is exposed to dietary changes it adjusts its functional behaviour. For example, a fatty diet demands certain digestive mechanisms, whereas others are needed to take care of a carbohydrate rich diet. Such dietary induced changes in appearance and functionality of the small intestinal mucosa have been described in animals but only little is known about it in man. The present project aims at elucidating in man if a 2 weeks diet dominated by either fat or carbohydrates, but with similar energy content, is associated with changes in the small intestinal mucosal appearance and metabolic signalling capacity.

| Condition          | Intervention                                                                  | Phase |
|--------------------|-------------------------------------------------------------------------------|-------|
| Healthy Conditions | Dietary Supplement: high fat diet (hfd)<br>Dietary Supplement: high carb diet | N/A   |

Study Type: Interventional

Study Design: Basic Science, Crossover Assignment, Open Label, Randomized, N/A

Official Title: Small Intestinal Adaptation to Isocaloric Diets Dominated Either by Fats or Carbohydrates

## Further study details as provided by Prof Lars Fandriks, Göteborg University:

### Primary Outcome Measure:

- Mucosal surface enlargement factor [Time Frame: Appearance after 2 weeks of diet] [Designated as safety issue: No]

The enlargement of the luminal surface area due to the villi structure is a morphometric factor defined as the total area of the mucosal surface in relation to the relatively flat area of the muscularis mucosae.

### Secondary Outcome Measures:

- Epithelial electrical current in-vitro [Time Frame: The condition after 2 weeks diet] [Designated as safety issue: No]  
Mucosal biopsies are mounted in miniUssing chambers. Ion-transporting capacity via SGLT-1 transported is reflected when switching from glucose-free to glucose-containing luminal solution, selectivity of transporter is confirmed by addition of phloridzin.
- Mucosal electrical resistance in vitro [Time Frame: The condition after 2 weeks diet] [Designated as safety issue: No]  
Mucosal biopsies are mounted in miniUssing chambers. Electrical resistance reflecting paracellular permeability is assessed when switching from glucose-free to glucose-containing luminal solution.
- Glycemic control following a test meal [Time Frame: The condition after 2 weeks diet] [Designated as safety issue: No]  
Blood concentrations of glucose and insulin are assessed over 2 hours following a mixed test meal.

Estimated Enrollment: 20

Study Start Date: March 2014

Estimated Study Completion Date: December 2014

Estimated Primary Completion Date: December 2014

| Arms                              | Assigned Interventions                                                                         |
|-----------------------------------|------------------------------------------------------------------------------------------------|
| Experimental: high fat diet       | Dietary Supplement: high fat diet (hfd)<br>Sixty % of the energy content is based on fat.      |
| Active Comparator: high carb diet | Dietary Supplement: high carb diet<br>Sixty % of the energy content is based on carbohydrates. |

## Eligibility

Ages Eligible for Study: 18 Years to 65 Years

Genders Eligible for Study: Both

Accepts healthy volunteers.

Inclusion Criteria:

healthy volunteer not taking prescribed medications BMI  $\leq 25$  kg/m<sup>2</sup>

Exclusion Criteria:

BMI  $\geq 26$  kg/m<sup>2</sup> smoker previous or current gastrointestinal disease significant abdominal surgery  
pregnancy/breast feeding drug intolerance of importance (particularly opiates and midazolam used during  
endoscopy) history of drug addiction

## Contacts and Locations

### Contacts

|                        |              |                                                                            |
|------------------------|--------------|----------------------------------------------------------------------------|
| Lars Fändriks, MD, PhD | +46313424123 | <a href="mailto:lars.fandriks@gastro.gu.se">lars.fandriks@gastro.gu.se</a> |
| Niclas Björnfot, RN    | +46313428404 | <a href="mailto:gastlab.su@vgregion.se">gastlab.su@vgregion.se</a>         |

### Locations

#### Sweden

|                                                            |              |
|------------------------------------------------------------|--------------|
| Dept of Gastrosurgical R&E, Sahlgrenska Universityhospital | Recruiting   |
| Gothenburg, Sweden, SE41345                                |              |
| Contact: Lars Fändriks, MD, PhD                            | +46313424123 |
| Principal Investigator: Lars Fändriks, MD, PhD             |              |

### Investigators

|                         |                                   |                          |
|-------------------------|-----------------------------------|--------------------------|
| Principal Investigator: | Lars Fändriks, MD, PhD, Professor | University of Gothenburg |
|-------------------------|-----------------------------------|--------------------------|

## More Information

Responsible Party: Prof Lars Fandriks, Professor, MD, PhD, Göteborg University  
Study ID Numbers: BUTTER  
Health Authority: Sweden: Central Ethical Review Board, Stockholm, Sweden

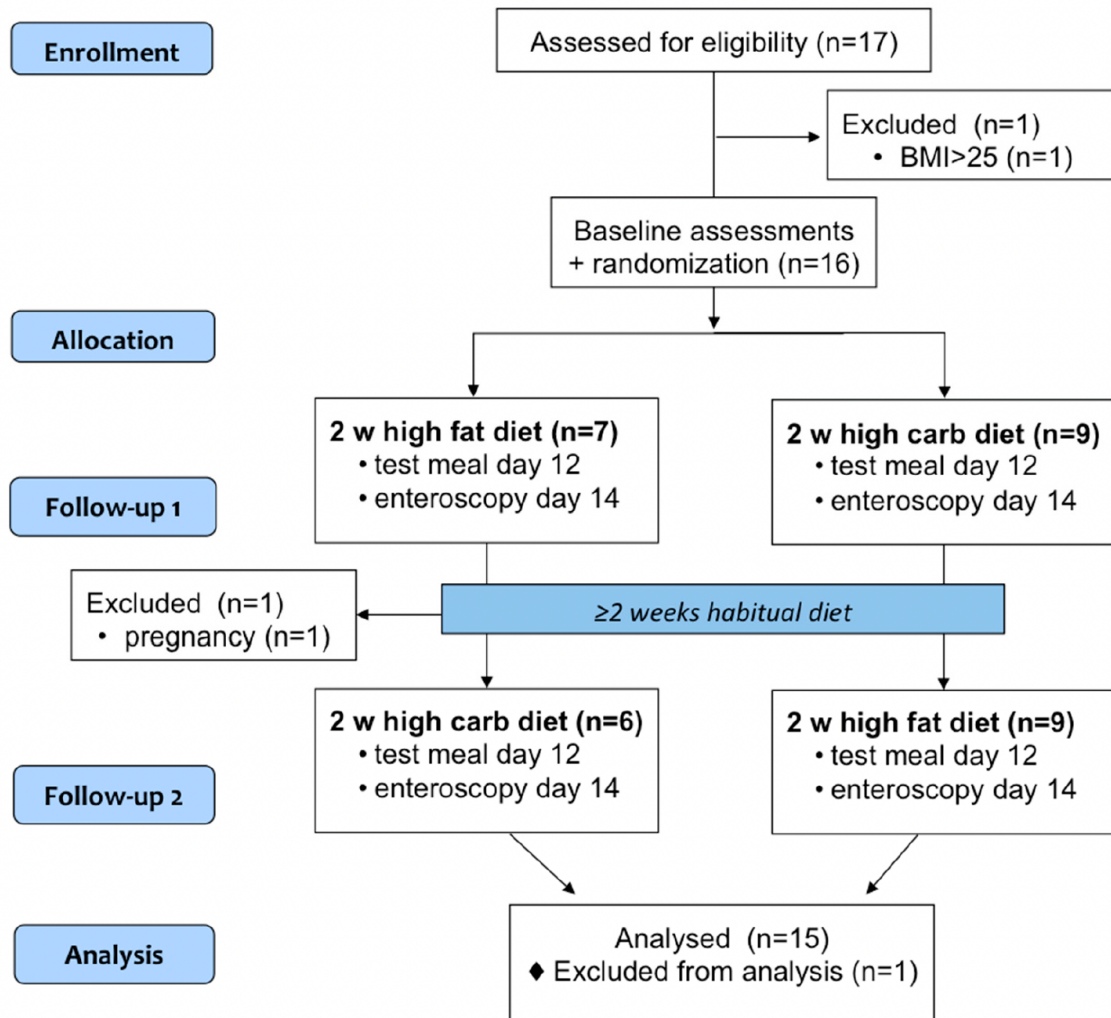

CONSORT diagram

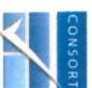

## CONSORT 2010 checklist of information to include when reporting a randomised trial\*

| Section/Topic      | Item No | Checklist item ( <i>Butter II</i> )                                                                                                   | Reported on page N |
|--------------------|---------|---------------------------------------------------------------------------------------------------------------------------------------|--------------------|
| Title and abstract | 1a      | Identification as a randomised trial in the title                                                                                     | 1                  |
|                    | 1b      | Structured summary of trial design, methods, results, and conclusions (for specific guidance see CONSORT for abstracts)               | 3 (in part)        |
| Introduction       | 2a      | Scientific background and explanation of rationale                                                                                    | 6                  |
|                    | 2b      | Specific objectives or hypotheses                                                                                                     | 6                  |
| Methods            | 3a      | Description of trial design (such as parallel, factorial) including allocation ratio                                                  | 8                  |
|                    | 3b      | Important changes to methods after trial commencement (such as eligibility criteria), with reasons                                    | -                  |
|                    | 4a      | Eligibility criteria for participants                                                                                                 | 8                  |
|                    | 4b      | Settings and locations where the data were collected                                                                                  | 8                  |
| Interventions      | 5       | The interventions for each group with sufficient details to allow replication, including how and when they were actually administered | 8                  |
| Outcomes           | 6a      | Completely defined pre-specified primary and secondary outcome measures, including how and when they were assessed                    | 8                  |
|                    | 6b      | Any changes to trial outcomes after the trial commenced, with reasons                                                                 | -                  |
| Sample size        | 7a      | How sample size was determined                                                                                                        | 8                  |

|                                                      |     |                                                                                                                                                                                             |             |
|------------------------------------------------------|-----|---------------------------------------------------------------------------------------------------------------------------------------------------------------------------------------------|-------------|
|                                                      | 7b  | When applicable, explanation of any interim analyses and stopping guidelines                                                                                                                | -           |
| <b>Randomisation:</b>                                |     |                                                                                                                                                                                             |             |
| Sequence                                             | 8a  | Method used to generate the random allocation sequence                                                                                                                                      | 8           |
| generation                                           | 8b  | Type of randomisation; details of any restriction (such as blocking and block size)                                                                                                         | 8           |
| Allocation                                           | 9   | Mechanism used to implement the random allocation sequence (such as sequentially numbered containers), describing any steps taken to conceal the sequence until interventions were assigned | 8           |
| concealment mechanism                                |     |                                                                                                                                                                                             |             |
| Implementation                                       | 10  | Who generated the random allocation sequence, who enrolled participants, and who assigned participants to interventions                                                                     | 8           |
| Blinding                                             | 11a | If done, who was blinded after assignment to interventions (for example, participants, care providers, those assessing outcomes) and how                                                    | -           |
|                                                      | 11b | If relevant, description of the similarity of interventions                                                                                                                                 | -           |
| Statistical methods                                  | 12a | Statistical methods used to compare groups for primary and secondary outcomes                                                                                                               | -           |
|                                                      | 12b | Methods for additional analyses, such as subgroup analyses and adjusted analyses                                                                                                            | 10          |
| <b>Results</b>                                       |     |                                                                                                                                                                                             |             |
| Participant flow (a diagram is strongly recommended) | 13a | For each group, the numbers of participants who were randomly assigned, received intended treatment, and were analysed for the primary outcome                                              | Suppl Fig 1 |
| Recruitment                                          | 13b | For each group, losses and exclusions after randomisation, together with reasons                                                                                                            | Suppl Fig 1 |
|                                                      | 14a | Dates defining the periods of recruitment and follow-up                                                                                                                                     | -           |
|                                                      | 14b | Why the trial ended or was stopped                                                                                                                                                          | -           |
| Baseline data                                        | 15  | A table showing baseline demographic and clinical characteristics for each group                                                                                                            | In ref 7    |
| Numbers analysed                                     | 16  | For each group, number of participants (denominator) included in each analysis and whether the analysis was by original assigned groups                                                     | 11          |
| Outcomes and estimation                              | 17a | For each primary and secondary outcome, results for each group, and the estimated effect size and its precision (such as 95% confidence interval)                                           | -           |
|                                                      | 17b | For binary outcomes, presentation of both absolute and relative effect sizes is recommended                                                                                                 | In ref 7    |

|                    |    |                                                                                                                                           |                   |    |
|--------------------|----|-------------------------------------------------------------------------------------------------------------------------------------------|-------------------|----|
| Ancillary analyses | 18 | Results of any other analyses performed, including subgroup analyses and adjusted analyses, distinguishing pre-specified from exploratory | 11                | ff |
| Harms              | 19 | All important harms or unintended effects in each group (for specific guidance see CONSORT for harms)                                     | unknown pregnancy |    |
| Discussion         |    |                                                                                                                                           |                   |    |
| Limitations        | 20 | Trial limitations, addressing sources of potential bias, imprecision, and, if relevant, multiplicity of analyses                          | 18                |    |
| Generalisability   | 21 | Generalisability (external validity, applicability) of the trial findings                                                                 | 18                |    |
| Interpretation     | 22 | Interpretation consistent with results, balancing benefits and harms, and considering other relevant evidence                             | 18 (novel !)      |    |
| Other information  |    |                                                                                                                                           |                   |    |
| Registration       | 23 | Registration number and name of trial registry                                                                                            | 4                 |    |
| Protocol           | 24 | Where the full trial protocol can be accessed, if available                                                                               | From PI           |    |
| Funding            | 25 | Sources of funding and other support (such as supply of drugs), role of funders                                                           | 3                 |    |

\* We strongly recommend reading this statement in conjunction with the CONSORT 2010 Explanation and Elaboration for important clarifications on all the items. If relevant, we also recommend reading CONSORT extensions for cluster randomised trials, non-inferiority and equivalence trials, non-pharmacological treatments, herbal interventions, and pragmatic trials. Additional extensions are forthcoming: for those and for up to date references relevant to this checklist, see [www.consort-statement.org](http://www.consort-statement.org).
